# Supplementary material for: Three luminescent metal–organic frameworks constructed from trinuclear zinc(ii) clusters and furan-2,5-dicarboxylate
Source: Royal Society of Chemistry journal article supplement (doi:10.1039/c5ce00931f), 2015-01-01
Supplement: c5ce00931f1.pdf [file c5ce00931f1.pdf]

## Three luminescent metal-organic frameworks constructed from trinuclear zinc(II) clusters and furan-2,5-dicarboxylate

Huan-Huan Li,<sup>a</sup> Zheng Niu,<sup>b</sup> Long Chen,<sup>\*ac</sup> Haobin Jiang,<sup>a</sup> Chaochun Yuan,<sup>a</sup> Ya-Ping Wang,<sup>\*d</sup> and Peng Cheng<sup>b</sup>

<sup>a</sup> *Automotive Engineering Research Institute, Jiangsu University, 301 Xuefu road, Zhenjiang 212013, P. R. China.*

<sup>b</sup> *Department of Chemistry and Key Laboratory of Advanced Energy Materials Chemistry (MOE), Nankai University, Tianjin 300071, P.R. China.*

<sup>c</sup> *Synergistic Innovation Center of Modern Agricultural Equipment and Technology, Jiangsu University, Zhenjiang 212013, P. R. China*

<sup>d</sup> *School of Material Science & Engineering, Center for Photon Manufacturing Science and Technology, Jiangsu University, Zhenjiang 212013, P. R. China.*

### Supporting information

#### 1. X-ray crystallography

The selected crystal parameters, data collection and refinements are summarized in Table S1. The selected bond lengths and angles are listed in Table S2. CCDC reference numbers for **1-3** are 1036655, 1036654 and 1023610, respectively.

**Table S1** Crystal data and structure refinement details for **1-3**

|                                                     | <b>1</b>                                                                       | <b>2</b>                                                                       | <b>3</b>                                                                 |
|-----------------------------------------------------|--------------------------------------------------------------------------------|--------------------------------------------------------------------------------|--------------------------------------------------------------------------|
| formula                                             | C <sub>34</sub> H <sub>38</sub> N <sub>4</sub> Zn <sub>3</sub> O <sub>22</sub> | C <sub>34</sub> H <sub>38</sub> N <sub>4</sub> O <sub>22</sub> Zn <sub>3</sub> | C <sub>14</sub> H <sub>17.068</sub> NZn <sub>3</sub> O <sub>14.034</sub> |
| fw                                                  | 1050.85                                                                        | 1050.85                                                                        | 620.12                                                                   |
| temp (K)                                            | 120                                                                            | 120                                                                            | 120                                                                      |
| cryst system                                        | Monoclinic                                                                     | Triclinic                                                                      | Monoclinic                                                               |
| space group                                         | <i>P</i> 2 <sub>1</sub> / <i>c</i>                                             | <i>P</i> -1                                                                    | <i>C</i> 2/ <i>c</i>                                                     |
| <i>a</i> (Å)                                        | 9.3468(12)                                                                     | 12.6947(8)                                                                     | 17.0962(9)                                                               |
| <i>b</i> (Å)                                        | 15.2267(8)                                                                     | 12.8242(6)                                                                     | 13.7039(7)                                                               |
| <i>c</i> (Å)                                        | 17.6517(8)                                                                     | 14.7971(7)                                                                     | 10.0192(5)                                                               |
| $\alpha$ (deg)                                      | 90                                                                             | 85.110(4)                                                                      | 90                                                                       |
| $\beta$ (deg)                                       | 95.599(8)                                                                      | 65.988(5)                                                                      | 105.432(6)                                                               |
| $\gamma$ (deg)                                      | 90                                                                             | 89.663(4)                                                                      | 90                                                                       |
| <i>V</i> (Å <sup>3</sup> )                          | 2500.2(4)                                                                      | 2191.4(2)                                                                      | 2262.7(2)                                                                |
| <i>Z</i>                                            | 2                                                                              | 2                                                                              | 4                                                                        |
| <i>D</i> <sub>c</sub> (g·cm <sup>-3</sup> )         | 1.396                                                                          | 1.593                                                                          | 1.814                                                                    |
| $\mu$ (mm <sup>-1</sup> )                           | 1.503                                                                          | 1.715                                                                          | 3.222                                                                    |
| <i>R</i> <sub>int</sub>                             | 0.0364                                                                         | 0.0350                                                                         | 0.0388                                                                   |
| GOF                                                 | 1.077                                                                          | 1.062                                                                          | 1.129                                                                    |
| <i>R</i> <sub>1</sub> [ <i>I</i> > 2σ( <i>I</i> )]  | 0.0832                                                                         | 0.0499                                                                         | 0.0709                                                                   |
| <i>wR</i> <sub>2</sub> [ <i>I</i> > 2σ( <i>I</i> )] | 0.2254                                                                         | 0.1282                                                                         | 0.1553                                                                   |
| <i>R</i> <sub>1</sub> (all data)                    | 0.1040                                                                         | 0.0640                                                                         | 0.0862                                                                   |
| <i>wR</i> <sub>2</sub> (all data)                   | 0.2447                                                                         | 0.1408                                                                         | 0.1642                                                                   |
| $\Delta\rho_{\max}$ (e Å <sup>-3</sup> )            | 0.89                                                                           | 1.47                                                                           | 0.87                                                                     |
| $\Delta\rho_{\min}$ (e Å <sup>-3</sup> )            | -2.33                                                                          | -0.91                                                                          | -1.20                                                                    |

**Table S2** Selected bond lengths [Å] and angles [°] for the complexes.

| <b>1</b>             |            |                       |           |
|----------------------|------------|-----------------------|-----------|
| Zn(1)-O(1)#1         | 1.985(5)   | O(2)#1-Zn(2)-O(5)#4   | 93.8(2)   |
| Zn(1)-O(5)           | 2.013(5)   | O(2)#3-Zn(2)-O(5)#4   | 86.2(2)   |
| Zn(1)-O(6)           | 1.979(5)   | O(2)#3-Zn(2)-O(5)     | 93.8(2)   |
| Zn(1)-O(10)#2        | 1.971(5)   | O(2)#1-Zn(2)-O(5)     | 86.2(2)   |
| Zn(2)-O(2)#3         | 2.097(6)   | O(2)#3-Zn(2)-O(7)#4   | 96.1(2)   |
| Zn(2)-O(2)#1         | 2.097(6)   | O(2)#1-Zn(2)-O(7)#4   | 83.9(2)   |
| Zn(2)-O(5)           | 2.265(5)   | O(2)#1-Zn(2)-O(7)     | 96.1(2)   |
| Zn(2)-O(5)#4         | 2.265(5)   | O(2)#3-Zn(2)-O(7)     | 83.9(2)   |
| Zn(2)-O(7)#4         | 2.252(5)   | O(5)-Zn(2)-O(5)#4     | 180.0     |
| Zn(2)-O(7)           | 2.252(5)   | O(7)#4-Zn(2)-O(5)#4   | 89.87(16) |
| O(1)#1-Zn(1)-O(5)    | 109.1(2)   | O(7)-Zn(2)-O(5)#4     | 90.13(16) |
| O(6)-Zn(1)-O(1)#1    | 100.0(2)   | O(7)-Zn(2)-O(5)       | 89.87(16) |
| O(6)-Zn(1)-O(5)      | 108.9(2)   | O(7)#4-Zn(2)-O(5)     | 90.13(16) |
| O(10)#2-Zn(1)-O(1)#1 | 107.1(2)   | O(7)#4-Zn(2)-O(7)     | 180.0     |
| O(10)#2-Zn(1)-O(5)   | 127.1(2)   | O(2)#3-Zn(2)-O(2)#1   | 180.0     |
| O(10)#2-Zn(1)-O(6)   | 101.3(2)   |                       |           |
| <b>2</b>             |            |                       |           |
| Zn(1)-O(5)           | 2.004(3)   | Zn(2)-O(15)#4         | 2.072(3)  |
| Zn(1)-O(7)#1         | 1.986(3)   | Zn(3)-O(2)            | 1.958(3)  |
| Zn(1)-O(14)#2        | 1.972(3)   | Zn(3)-O(10)#5         | 1.957(3)  |
| Zn(1)-O(19)#3        | 2.137(3)   | Zn(3)-O(11)           | 1.963(3)  |
| Zn(1)-O(20)#3        | 2.113(13)  | Zn(3)-O(17)#6         | 1.942(3)  |
| Zn(1)-O(20)#3        | 2.326(11)  | Zn(4)-O(16)           | 2.145(3)  |
| Zn(2)-O(5)           | 2.136(3)   | Zn(4)-O(1)            | 2.144(3)  |
| Zn(2)-O(5)#1         | 2.136(3)   | Zn(4)-O(9)#5          | 2.071(3)  |
| Zn(2)-O(6)#1         | 2.062(3)   | Zn(4)-O(9)#7          | 2.071(3)  |
| Zn(2)-O(6)           | 2.062(3)   | Zn(4)-O(16)           | 2.107(3)  |
| Zn(2)-O(15)#2        | 2.072(3)   | Zn(4)-O(16)#6         | 2.107(3)  |
| O(5)-Zn(1)-Zn(2)     | 39.89(8)   | O(6)#2-Zn(2)-O(15)#4  | 86.63(12) |
| O(5)-Zn(1)-O(19)#1   | 95.37(14)  | O(6)-Zn(2)-O(15)#4    | 93.37(12) |
| O(5)-Zn(1)-O(20)#1   | 150.8(4)   | O(6)-Zn(2)-O(15)#3    | 86.63(12) |
| O(5)-Zn(1)-O(20)#1   | 154.4(3)   | O(6)#2-Zn(2)-O(15)#3  | 93.37(12) |
| O(7)#2-Zn(1)-Zn(2)   | 82.57(9)   | O(15)#4-Zn(2)-Zn(1)   | 109.23(8) |
| O(7)#2-Zn(1)-O(5)    | 96.36(12)  | O(15)#3-Zn(2)-Zn(1)   | 70.77(8)  |
| O(7)#2-Zn(1)-O(19)#1 | 106.34(13) | O(15)#4-Zn(2)-Zn(1)#2 | 70.77(8)  |
| O(7)#2-Zn(1)-O(20)#1 | 100.5(3)   | O(15)#3-Zn(2)-Zn(1)#2 | 109.23(8) |
| O(7)#2-Zn(1)-O(20)#1 | 84.5(3)    | O(15)#4-Zn(2)-O(5)#2  | 92.04(11) |

|                        |            |                       |            |
|------------------------|------------|-----------------------|------------|
| O(14)#3-Zn(1)- Zn(2)   | 81.17(9)   | O(15)#3-Zn(2)-O(5)#2  | 87.96(11)  |
| O(14)#3-Zn(1)-O(5)     | 104.91(12) | O(15)#3-Zn(2)-O(5)    | 92.04(11)  |
| O(14)#3-Zn(1)-O(7)#2   | 122.29(13) | O(15)#4-Zn(2)-O(5)    | 87.96(11)  |
| O(14)#3-Zn(1)-O(19)#1  | 123.69(14) | O(15)#3-Zn(2)-O(15)#4 | 180.00(16) |
| O(14)#3-Zn(1)-O(20) #1 | 85.9(3)    | O(2)-Zn(3)-O(11)      | 103.77(13) |
| O(14)#3-Zn(1)-O(20)#1  | 96.0(3)    | O(10)#5-Zn(3)-O(2)    | 106.84(14) |
| O(19)#1-Zn(1)-Zn(2)    | 135.21(11) | O(10)#5-Zn(3)-O(11)   | 101.90(13) |
| O(19)#1-Zn(1)-O(20)#1  | 60.2(3)    | O(17)#6-Zn(3)-O(2)    | 125.95(13) |
| O(20)#1-Zn(1)-Zn(2)    | 166.3(3)   | O(17)#6-Zn(3)-O(10)#5 | 109.30(13) |
| O(20)#1-Zn(1)-O(19)#1  | 57.0(4)    | O(17)#6-Zn(3)-O(11)   | 106.44(13) |
| O(20)#1-Zn(1)-O(20)#1  | 16.1(3)    | O(1)-Zn(4)-O(16)      | 180.0      |
| O(20)#1-Zn(1)-Zn(2)    | 162.6(2)   | O(9)#7-Zn(4)-O(16)    | 94.28(12)  |
| O(5)#2-Zn(2)-Zn(1)#2   | 36.98(8)   | O(9)#5-Zn(4)-O(1)     | 94.28(12)  |
| O(5)#2-Zn(2)-Zn(1)     | 143.02(8)  | O(9)#7-Zn(4)-O(1)     | 85.72(12)  |
| O(5)-Zn(2)-Zn(1)       | 36.98(8)   | O(9)#5-Zn(4)-O(16)    | 85.72(12)  |
| O(5)-Zn(2)-Zn(1)#2     | 143.02(8)  | O(9)#5-Zn(4)-O(9)#7   | 180.0      |
| O(5)-Zn(2)-O(5)#2      | 180.0      | O(9)#5-Zn(4)-O(16)#6  | 94.52(11)  |
| O(6)#2-Zn(2)-Zn(1)#2   | 116.03(8)  | O(9)#5-Zn(4)-O(16)    | 85.48(11)  |
| O(6)-Zn(2)-Zn(1)#2     | 63.97(8)   | O(9)#7-Zn(4)-O(16)#6  | 85.48(11)  |
| O(6)#2-Zn(2)-Zn(1)     | 63.97(8)   | O(9)#7-Zn(4)-O(16)    | 94.52(11)  |
| O(6)-Zn(2)-Zn(1)       | 116.03(8)  | O(16)#6-Zn(4)-O(16)   | 81.37(11)  |
| O(6)-Zn(2)-O(5)        | 88.42(11)  | O(16)#6-Zn(4)-O(1)    | 98.63(11)  |
| O(6)#2-Zn(2)-O(5)#2    | 88.42(11)  | O(16)-Zn(4)-O(16)     | 98.63(11)  |
| O(6)-Zn(2)-O(5)#2      | 91.58(11)  | O(16)-Zn(4)-O(1)      | 81.37(11)  |
| O(6)#2-Zn(2)-O(5)      | 91.58(11)  | O(16)#6-Zn(4)-O(16)   | 180.0      |
| O(6)-Zn(2)-O(6)#2      | 180.0      |                       |            |

### 3

|                     |           |                      |          |
|---------------------|-----------|----------------------|----------|
| Zn(1)-O(1)#1        | 2.168(5)  | Zn(2)-O(2)           | 2.029(6) |
| Zn(1)-O(4)          | 2.031(5)  | Zn(2)-O(6)           | 1.865(5) |
| Zn(1)-O(5)#2        | 2.129(5)  | Zn(2)-O(6)#5         | 1.981(6) |
| Zn(1)-O(6)#3        | 1.960(5)  | Zn(2)-O(7)           | 1.880(7) |
| Zn(1)-O(7)#4        | 1.946(12) | Zn(2)-O(7)#5         | 1.966(7) |
| Zn(1)-O(7)#1        | 2.094(12) | Zn(2)#5-Zn(2)-O(2)   | 167.5(5) |
| O(4)-Zn(1)-O(1)#1   | 98.9(3)   | Zn(2)#5-Zn(2)-O(6)#5 | 70.1(4)  |
| O(4)- Zn(1)-O(5)#2  | 94.9(2)   | Zn(2)#5-Zn(2)-O(6)   | 87.7(4)  |
| O(4)-Zn(1)-O(7)#1   | 94.3(3)   | Zn(2)#5-n(2)-O(7)#5  | 72.4(3)  |
| O(5)#2-Zn(1)-O(1)#1 | 164.8(2)  | Zn(2)#5-Zn(2)-O(7)   | 85.3(3)  |
| O(6)#3-Zn(1)-O(1)#1 | 85.4(2)   | O(6)-Zn(2)-O(2)      | 104.8(2) |
| O(6)#3-Zn(1)-O(4)   | 97.6(2)   | O(6)#5-Zn(2)-O(2)    | 102.2(2) |
| O(6)#3-Zn(1)-O(5)#2 | 86.5(2)   | O(6)-Zn(2)-O(6)#5    | 118.0(3) |

|                     |          |                     |          |
|---------------------|----------|---------------------|----------|
| O(6)#3-Zn(1)-O(7)#1 | 167.7(3) | O(6)-Zn(2)-O(7)#5   | 122.5(4) |
| O(7)#1-Zn(1)-O(1)#1 | 89.7(3)  | O(6)-Zn(2)-O(7)     | 113.5(4) |
| O(7)#4-Zn(1)-O(1)#1 | 93.6(3)  | O(7)-Zn(2)-O(2)     | 90.7(4)  |
| O(7)#4-Zn(1)-O(4)   | 108.8(3) | O(7)#5-Zn(2)-O(2)   | 101.1(4) |
| O(7)#4-Zn(1)-O(5)#2 | 87.9(3)  | O(7)-Zn(2)-O(6)#5   | 120.9(4) |
| O(7)#1-Zn(1)-O(5)#2 | 95.7(3)  | O(7)#5-Zn(2)-O(6)#5 | 105.0(3) |
| O(7)#4-Zn(1)-O(6)#3 | 153.4(3) | O(7)-Zn(2)-O(7)#5   | 17.0(5)  |
| O(7)#4-Zn(1)-O(7)#1 | 15.9(5)  |                     |          |

**1**, #1 -1+X, +Y, +Z; #2 +X, 3/2-Y, -1/2+Z; #3 1-X, 1-Y, 1-Z; #4 -X, 1-Y, 1-Z; #5 1+X, +Y, +Z; #6 +X, 3/2-Y, 1/2+Z

**2**, #1 1-X, -Y, 1-Z; #2 1-X, -Y, -Z; #3 -1+X, +Y, +Z; #4 +X, +Y, 1+Z; #5 2-X, -Y, -Z; #6 2-X, 1-Y, -Z; #7 +X, 1+Y, +Z; #8 +X, -1+Y, +Z; #9 +X, +Y, -1+Z; #10 1+X, +Y, +Z

**3**, #1 1/2-X, 1/2+Y, 1/2-Z; #2 1-X, +Y, 1/2-Z; #3 1/2-X, 1/2-Y, 1-Z; #4 1/2+X, 1/2+Y, +Z; #5 -X, +Y, 1/2-Z; #6 1/2-X, -1/2+Y, 1/2-Z; #7 -1/2+X, -1/2+Y, +Z

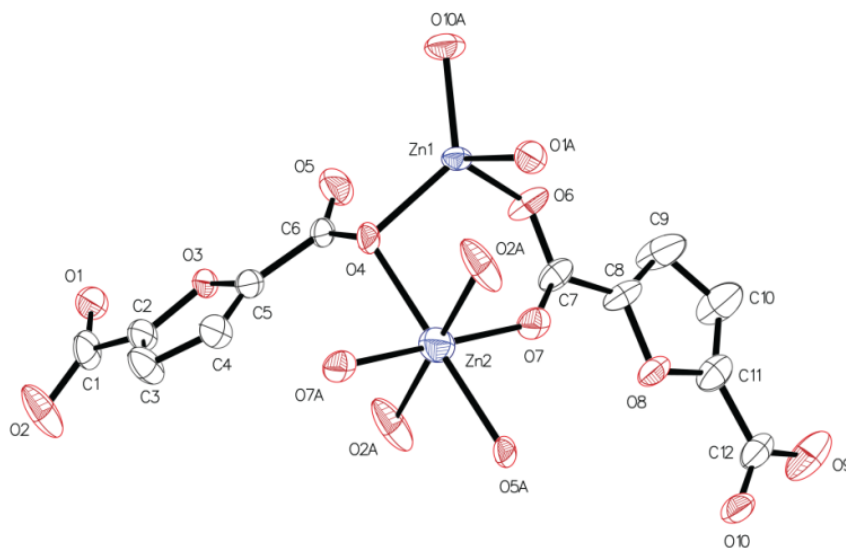

**Fig. S1.** ORTEP drawing of the structural unit of **1** (thermal ellipsoids are drawn at the 30% probability level; H atoms were omitted for clarity).

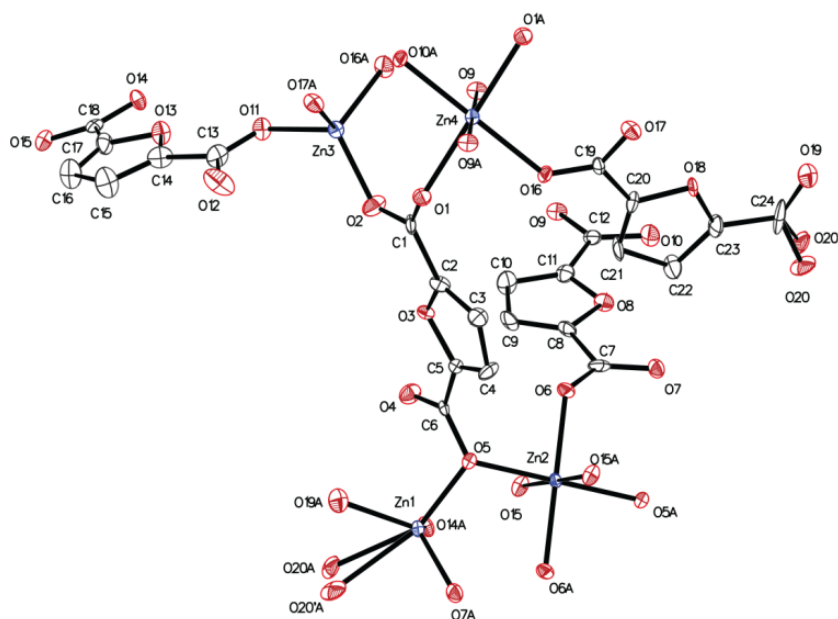

**Fig. S2.** ORTEP drawing of the structural unit of **2** (thermal ellipsoids are drawn at the 30% probability level; H atoms were omitted for clarity).

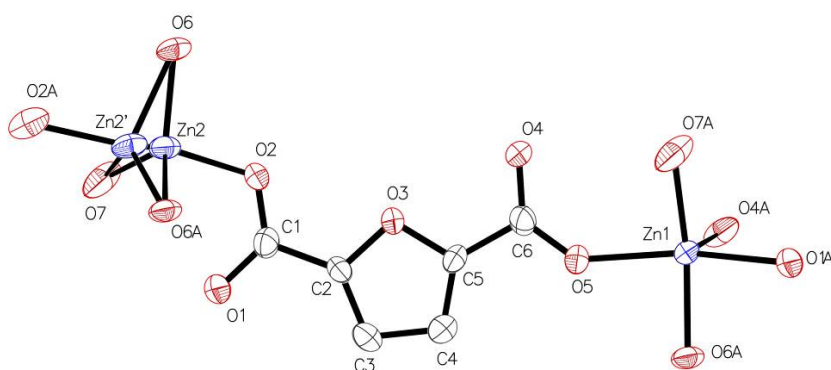

**Fig. S3.** ORTEP drawing of structural unit of **3** (thermal ellipsoids are drawn at the 30% probability level; H atoms were omitted for clarity.)

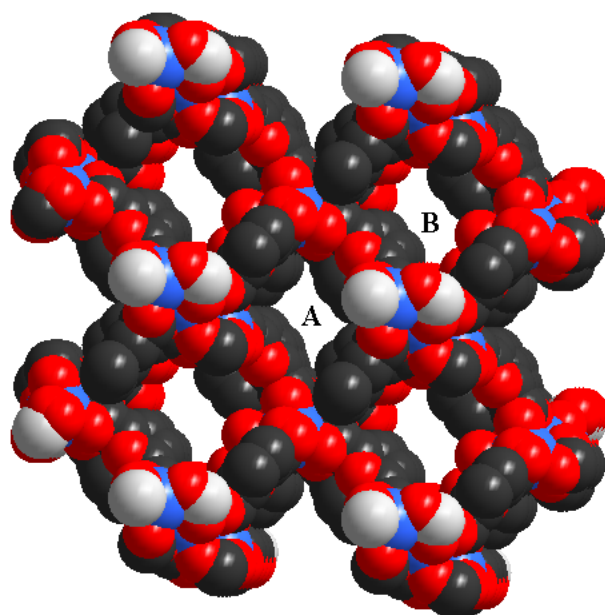

**Fig. S4.** Space filling view of the 3D framework along the  $[1,0,0]$  direction of **2**. Zn is in blue, O in red, and C in gray.

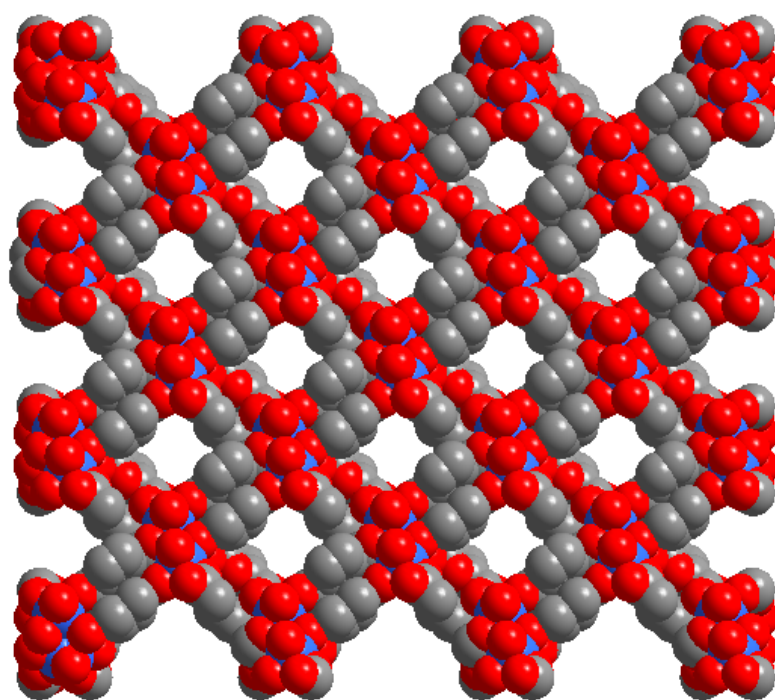

**Fig. S5.** Space filling view of the 3D framework along the  $[0,0,1]$  direction of **3**. Zn in blue, O in red, C in gray.

## 2. PXRD and TGA patterns

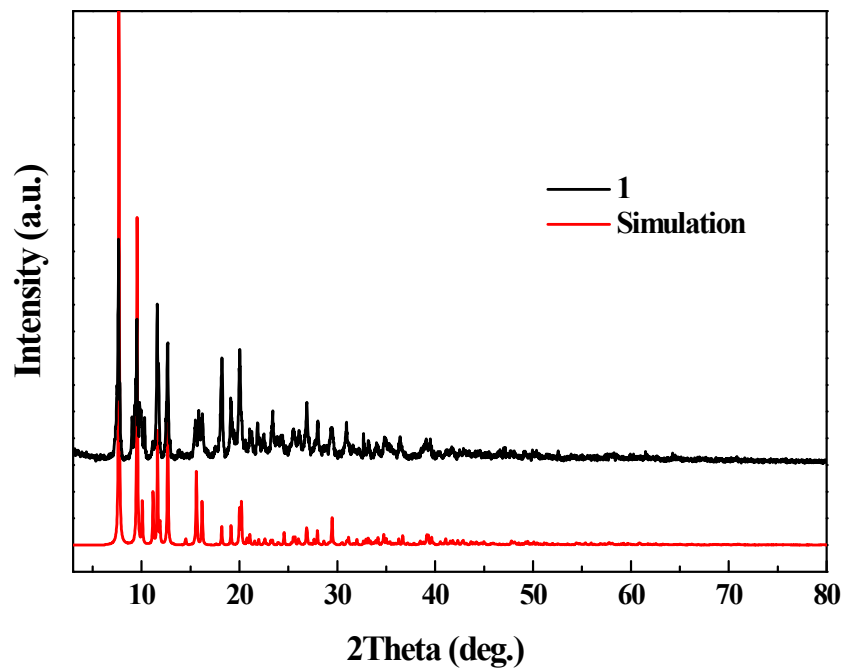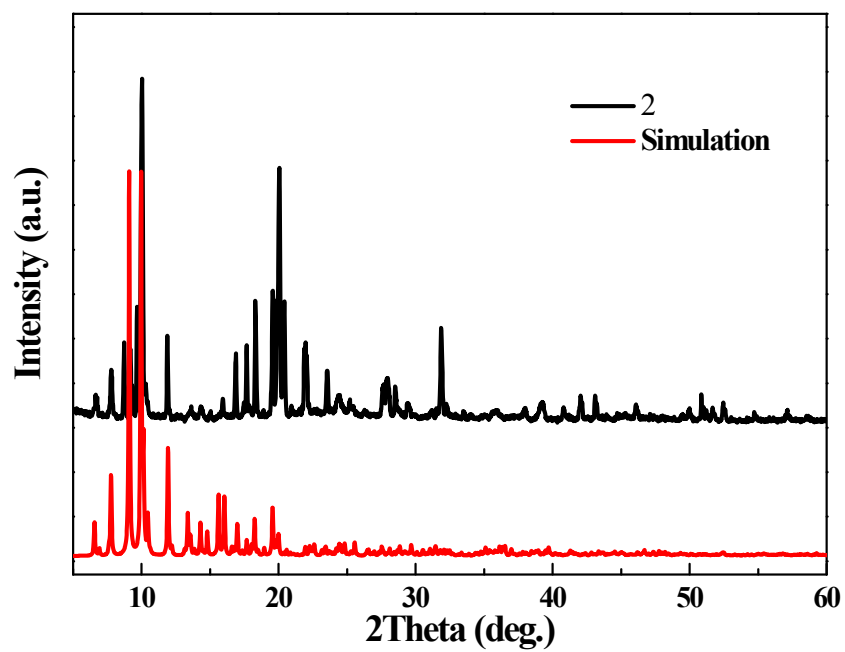



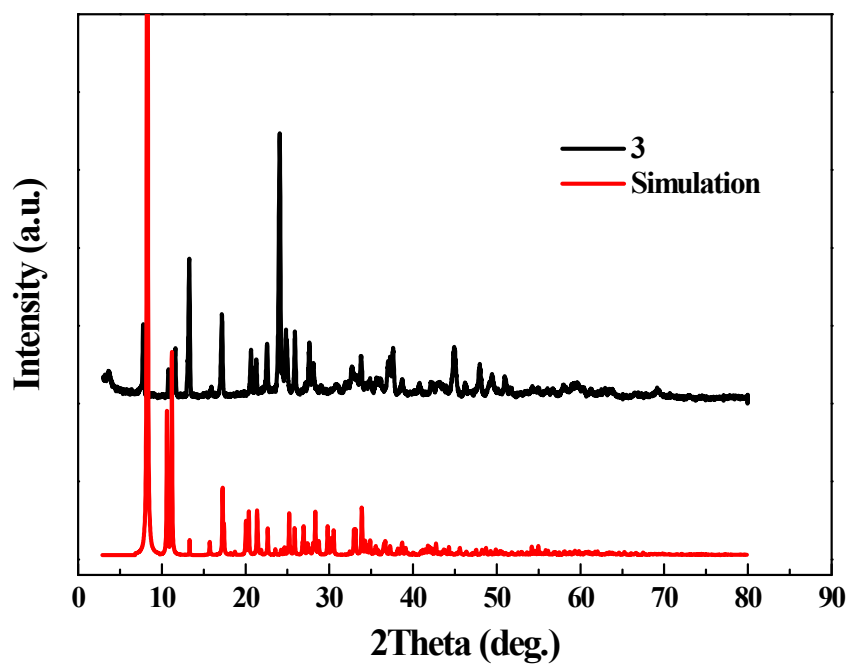

**Fig. S6.** The simulated X-ray powder diffraction patterns (lower) and the measured one (upper) of compound 1-3.

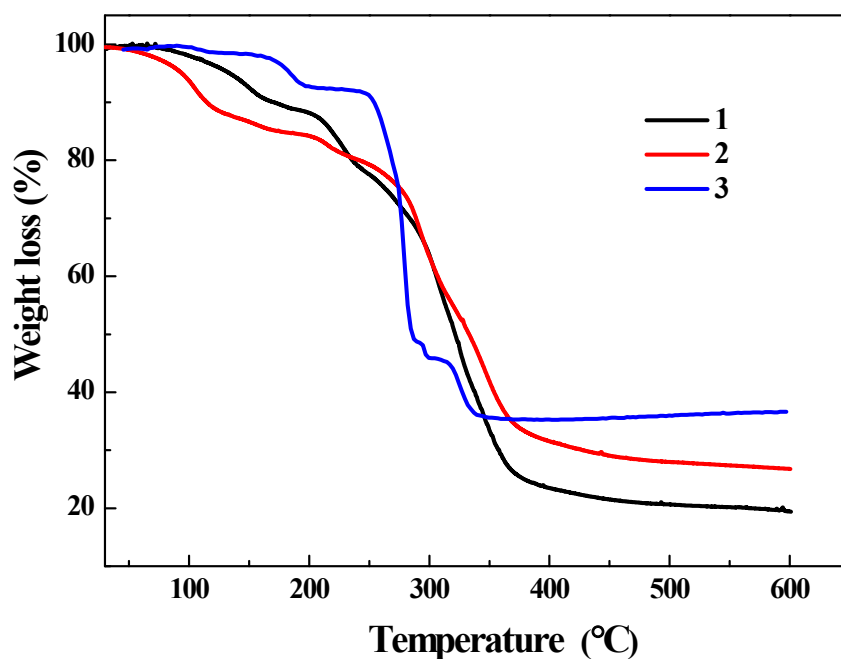

**Fig. S7.** TGA plots of 1-3.
